# Supplementary material
Source: HighWire-hosted journal article supplement (http://www.qdcxjkg.com/highwire/filestream/113767/field_highwire_adjunct_files/0/Supplement.pdf)
Supplement: Supplement.pdf [file Supplement.pdf]

**--- ONLINE DATA SUPPLEMENT ---**

**Prevalence and Prognosis of  
Unclassifiable Interstitial Lung Disease**

Christopher J. Ryerson, Thomas H. Urbania, Luca Richeldi,  
Joshua Mooney, Joyce S. Lee, Kirk D. Jones, Brett M. Elicker,  
Laura L. Koth, Talmadge E. King, Jr., Paul J. Wolters, Harold R. Collard

**Figure E1.** Diagnoses of patients enrolled in the UCSF database during the study period.

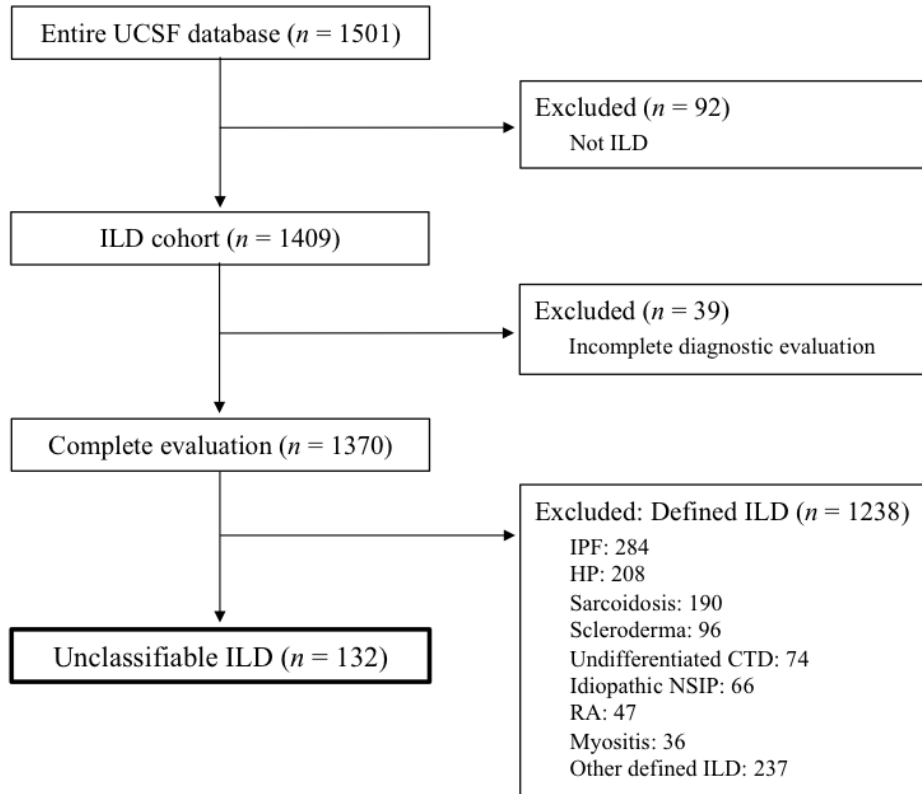

**Table E1.** Characteristics of patients excluded due to incomplete medical records.

| <b>Variable</b>                     | <b>Unclassifiable cohort<br/>(n=132)</b> | <b>Incomplete medical records<br/>(n=39)</b> | <b>p value</b> |
|-------------------------------------|------------------------------------------|----------------------------------------------|----------------|
| Age, years                          | 67.8 (12.9)                              | 59.1 (13.3)                                  | p = 0.0005     |
| Male sex, %                         | 53.0%                                    | 43.6%                                        | p = 0.34       |
| <b>Smoking history</b>              |                                          |                                              |                |
| Ever smoked, %                      | 63.6%                                    | 64.1%                                        | p = 0.98       |
| Pack-years                          | 16.0 (23.9)                              | 20.2 (27.7)                                  | p = 0.39       |
| <b>Measures of disease severity</b> |                                          |                                              |                |
| Long-term oxygen therapy, %         | 21.9%                                    | 12.5%                                        | p = 0.21       |
| <b>Pulmonary function</b>           |                                          |                                              |                |
| FVC, % predicted                    | 69.0 (22.1)                              | 77.8 (20.9)                                  | p = 0.03       |
| DLCO, % predicted                   | 47.6 (19.7)                              | 60.5 (21.2)                                  | p = 0.0009     |
| <b>HRCT findings</b>                |                                          |                                              |                |
| Fibrosis score*                     | 20.3 (13.1)                              | 10.7 (7.2)                                   | p = 0.002      |
| <b>UIP pattern</b>                  |                                          |                                              | p = 0.007      |
| Not UIP                             | 33.0%                                    | 66.7%                                        |                |
| Possible UIP                        | 49.5%                                    | 33.3%                                        |                |
| Definite UIP                        | 17.4%                                    | 0%                                           |                |
| Honeycombing, %                     | 49.5%                                    | 23.8%                                        | p = 0.03       |

Values are reported as mean (standard deviation) or percent. P values are reported for comparison between the stated subgroup and the remaining unclassifiable cohort, using Chi-squared test, Fisher's Exact test, t-test, or Wilcoxon rank sum test as appropriate.

Abbreviations: DLCO, diffusion capacity of carbon monoxide; FVC, forced vital capacity; HRCT; high-resolution computed tomography; UIP, usual interstitial pneumonia.

**Table E2.** Differences in baseline characteristics comparing unclassifiable ILD subgroups.

| Variable                            | Entire unclassifiable cohort (n=132) | Too old or frail for lung biopsy (n=68) | Conflicting CRP data (n=24) | Mild/Stable disease (n=12) | Insufficient tissue on lung biopsy (n=11) | Patient unwillingness for lung biopsy (n=10) |
|-------------------------------------|--------------------------------------|-----------------------------------------|-----------------------------|----------------------------|-------------------------------------------|----------------------------------------------|
| Age, years                          | 67.8 (12.9)                          | 73.0 (10.6)                             | 60.2 (11.6)                 | 60.9 (16.4)                | 62.0 (12.9)                               | 71.2 (6.7)                                   |
| Male sex, %                         | 53.0%                                | 57.4%                                   | 41.7%                       | 41.7%                      | 45.5%                                     | 70.0%                                        |
|                                     |                                      | p < 0.00005<br>p = 0.31                 | p = 0.001<br>p = 0.22       | p = 0.05<br>p = 0.41       | p = 0.12<br>p = 0.60                      | p = 0.39<br>p = 0.33                         |
| <b>Smoking history</b>              |                                      |                                         |                             |                            |                                           |                                              |
| Ever smoked, %                      | 63.6%                                | 75.0%                                   | 50.0%                       | 50.0%                      | 54.6%                                     | 60.0%                                        |
| Pack-years*                         | 16.0 (23.9)                          | 20.1 (27.6)                             | 10.6 (16.9)                 | 8.6 (14.3)                 | 17.5 (28.2)                               | 11.5 (16.4)                                  |
|                                     |                                      | p = 0.005<br>p = 0.03                   | p = 0.13<br>p = 0.20        | p = 0.30<br>p = 0.28       | p = 0.51<br>p = 0.83                      | p = 1.00<br>p = 0.78                         |
| <b>Measures of disease severity</b> |                                      |                                         |                             |                            |                                           |                                              |
| Long-term oxygen therapy, %         | 21.9%                                | 28.4%                                   | 17.4%                       | 8.3%                       | 36.4%                                     | 0%                                           |
|                                     |                                      | p = 0.06                                | p = 0.57                    | p = 0.69                   | p = 0.22                                  | p = 0.12                                     |
| <b>Pulmonary function</b>           |                                      |                                         |                             |                            |                                           |                                              |
| FVC, % predicted                    | 69.0 (22.1)                          | 69.3 (18.8)                             | 66.5 (24.6)                 | 83.6 (26.6)                | 59.6%                                     | 69.1 (22.5)                                  |
|                                     |                                      | p = 0.86                                | p = 0.54                    | p = 0.02                   | p = 22.9                                  | p = 0.99                                     |
| DLCO, % predicted                   | 47.6 (19.7)                          | 39.4 (14.8)                             | 55.1 (21.9)                 | 65.1 (14.2)                | 54.6 (17.0)                               | 52.8 (18.7)                                  |
|                                     |                                      | p < 0.00005                             | p = 0.47                    | p = 0.003                  | p = 0.27                                  | p = 0.38                                     |
| <b>HRCT findings</b>                |                                      |                                         |                             |                            |                                           |                                              |
| Fibrosis score                      | 20.3 (13.1)                          | 23.0 (13.0)                             | 19.4 (13.8)                 | 9.6 (11.8)                 | 20.4 (13.4)                               | 18.5 (7.5)                                   |
|                                     |                                      | p = 0.02                                | p = 0.75                    | p = 0.01                   | p = 0.97                                  | p = 0.68                                     |
| UIP pattern                         |                                      | p = 0.08                                | 0.48                        | p = 0.20                   | p = 0.47                                  | p = 0.23                                     |
| Inconsistent with UIP               | 33.0%                                | 23.7%                                   | 44.4%                       | 55.6%                      | 50.0%                                     | 11.1%                                        |
| Possible UIP                        | 49.5%                                | 55.9%                                   | 44.4%                       | 44.4%                      | 40.0%                                     | 55.6%                                        |
| UIP                                 | 17.4%                                | 20.3%                                   | 11.1%                       | 0%                         | 10.0%                                     | 33.3%                                        |
| Honeycombing, %                     | 49.5%                                | 57.6%                                   | 33.3%                       | 33.3%                      | 50.0%                                     | 55.6%                                        |
|                                     |                                      | p = 0.07                                | p = 0.13                    | p = 0.49                   | p = 0.98                                  | p = 0.74                                     |

Values are reported as mean (standard deviation) or percent. P values are reported for comparison between the stated subgroup and the remaining unclassifiable cohort, using Chi-squared test, Fisher's Exact test, t-test, or Wilcoxon rank sum test as appropriate.

Abbreviations: CRP, clinical, radiological and pathological; DLCO, diffusion capacity of carbon monoxide; FVC, forced vital capacity; HRCT; high-resolution computed tomography; UIP, usual interstitial pneumonia.
